# Supplementary material for: N-acetyl-seryl-aspartyl-lysyl-proline Inhibits Diabetes-Associated Kidney Fibrosis and Endothelial-Mesenchymal Transition
Source: Hindawi journal article supplement (doi:10.1155/2014/696475), 2014-01-01
Supplement: f1 [file 696475.f1.pdf]

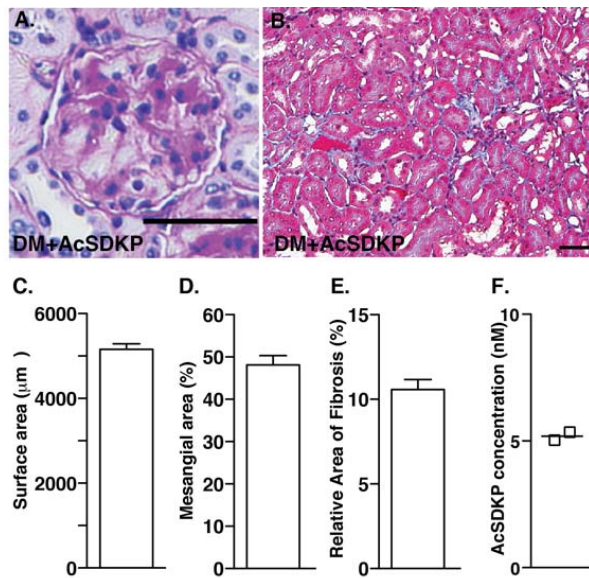

**Supple. Figure 1: AcSDKP alone partially ameliorates kidney histology.**

Anti-fibrotic effects of AcSDKP have been well described. Therefore preliminary we tested anti-fibrotic effects of AcSDKP alone in small cohort. **A, B.** The kidney histology picture obtained from diabetic mice treated with AcSDKP alone. Representative A) PAS and B) MTS staining were shown. Scale bar: 50 μm. **C-E.** Morphometric analysis. The glomerular surface area (**C**), relative mesangial area (**D**), and relative area of fibrosis (**E**) were analyzed by the method described in the Materials and Methods section. **F.** Plasma concentration of AcSDKP in the diabetic mice treated with AcSDKP alone (n=2). These data are included in main **Figure 2 C-D**.

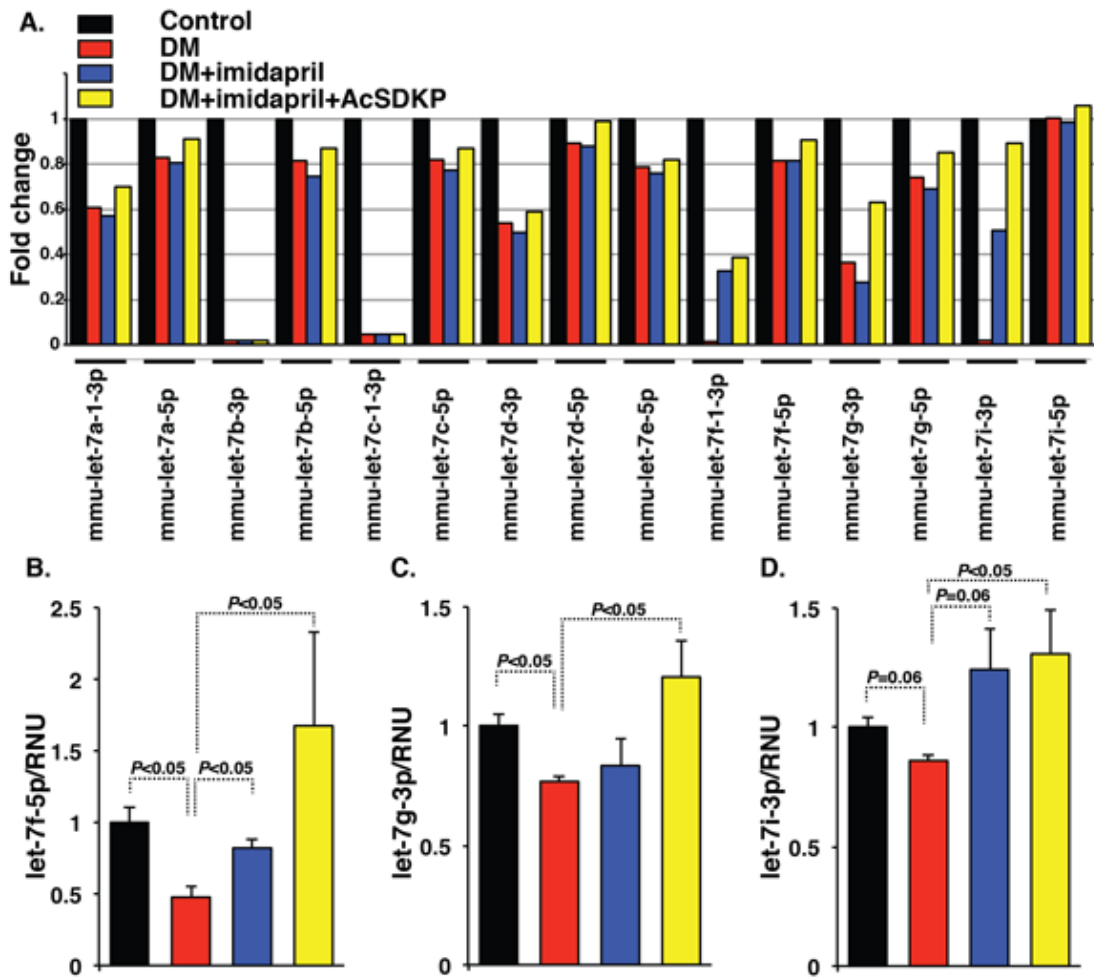

**Supple. Figure 2: AcSDKP restored microRNA let-7 family.** **A.** Total RNA, including the microRNA fraction, was harvested from the frozen kidney samples and microRNA array analysis was performed.  $n=2$  in each group. The average value for each group is shown. In each data set, the relative level of expression compared to that of control mice is shown. **B, C, D.** qPCR analysis for the indicated members of the let-7 microRNA family.  $n=5$  or  $6$  for each group. Diabetes is designated as DM.
